# Supplementary material for: Impact of initial active engagement in self-monitoring with a telemonitoring device on glycemic control among patients with type 2 diabetes
Source: PubMed Central journal article supplement (PMC5478652; doi:10.1038/s41598-017-03842-2), 2017-06-20
Supplement: 41598_2017_3842_MOESM1_ESM.pdf [file 41598_2017_3842_MOESM1_ESM.pdf]

## **Impact of initial active engagement in self-monitoring with a telemonitoring device on glycemic control among patients with type 2 diabetes**

Min-Kyung Lee<sup>1</sup>, Kwang-Hyeon Lee<sup>2</sup>, Seung-Hyun Yoo<sup>3</sup>, Cheol-Young Park<sup>4\*</sup>

<sup>1</sup>Division of Endocrinology and Metabolism, Department of Internal Medicine, Myongji hospital, Seonam University College of Medicine, Gyeonggi-do, Korea

<sup>2</sup>Samsung Electronics Co. Ltd., Health R&D Group

<sup>3</sup>National Health Insurance Service, Seoul, Korea

<sup>4</sup>Division of Endocrinology and Metabolism, Department of Internal Medicine, Kangbuk Samsung Hospital, Sungkyunkwan University School of Medicine, Seoul, Korea

**\*Corresponding Author:** Cheol-Young Park

Division of Endocrinology and Metabolism, Department of Internal Medicine, Kangbuk Samsung Hospital, Sungkyunkwan University School of Medicine, 29 Saemunan-ro, Jongno-gu, Seoul 03181, Korea

Tel: +82-2-2001-1869; Fax: +82-2-2001-1588

E-mail: [cydoctor@chol.com](mailto:cydoctor@chol.com)

|                           | $\beta$ (95% CI)      | p     |
|---------------------------|-----------------------|-------|
| Age, yr                   | 0.024 (0.004-0.044)   | 0.020 |
| Sex, male, % (n)          | -0.164 (-0.576-0.249) | 0.433 |
| Weight, kg                | 0.001 (-0.004-0.005)  | 0.871 |
| BMI, kg/m <sup>2</sup>    | -0.010 (-0.004-0.005) | 0.522 |
| SBP, mmHg                 | 0.005 (-0.008-0.018)  | 0.431 |
| LDL-C, mg/dL              | 0.001 (0.197-0.844)   | 0.844 |
| Fructosamine, $\mu$ mol/L | 0.001 (-0.002-0.004)  | 0.697 |
| HbA1c, %                  | -0.097 (-0.214-0.020) | 0.105 |
| Self-efficacy scale       | 0.010 (0.003-0.017)   | 0.005 |

**Supplementary Table S1. Linear regression analysis of factors associated with SMBG frequency of the first 6 weeks.**
